# Supplementary material for: Telomere Length Homeostasis Responds to Changes in Intracellular dNTP Pools
Source: Oxford University Press journal article supplement (doi:10.1534/genetics.112.149120), 2013-01-19
Supplement: genetics.112.149120-3.pdf [file genetics.112.149120-3.pdf]

#### SUPPORTING REFERENCES

- BRACHMANN, C. B., A. DAVIES, G. J. COST, E. CAPUTO, J. LI *et al.*, 1998 Designer deletion strains derived from *Saccharomyces cerevisiae* S288C: a useful set of strains and plasmids for PCR-mediated gene disruption and other applications. *Yeast* **14**: 115-132.
- CHABES, A., B. GEORGIEVA, V. DOMKIN, X. ZHAO, R. ROTHSTEIN *et al.*, 2003 Survival of DNA damage in yeast directly depends on increased dNTP levels allowed by relaxed feedback inhibition of ribonucleotide reductase. *Cell* **112**: 391-401.
- CRISTOFARI, G., P. REICHENBACH, P. O. REGAMEY, D. BANFI, M. CHAMBON *et al.*, 2007 Low- to high-throughput analysis of telomerase modulators with Telospot. *Nat Methods* **4**: 851-853.
- DIONNE, I., and R. J. WELLINGER, 1996 Cell cycle-regulated generation of single-stranded G-rich DNA in the absence of telomerase. *Proc Natl Acad Sci USA* **93**: 13902-13907.
- KUMAR, D., J. VIBERG, A. K. NILSSON and A. CHABES, 2010 Highly mutagenic and severely imbalanced dNTP pools can escape detection by the S-phase checkpoint. *Nucleic Acids Res* **38**: 3975-3983.
- ZHAO, X., E. G. MULLER and R. ROTHSTEIN, 1998 A suppressor of two essential checkpoint genes identifies a novel protein that negatively affects dNTP pools. *Mol Cell* **2**: 329-340.
