# Supplementary material for: Telomere Length Homeostasis Responds to Changes in Intracellular dNTP Pools
Source: Oxford University Press journal article supplement (doi:10.1534/genetics.112.149120), 2013-01-19
Supplement: genetics.112.149120-4.pdf [file genetics.112.149120-4.pdf]

**TABLE S1 Yeast strains used in this study.** All strains are derivatives of W1588-4C, except for BY4742, W9882 and the MCY strains. W9882 and the MCY strains are derivatives of BY4742.

| Strain    | Genotype                                                             | Reference                      |
|-----------|----------------------------------------------------------------------|--------------------------------|
| W1588-4C  | <i>MATa ade2-1 can1-100 his3-11,15 leu2-3,112 trp1-1 ura3-1 RAD5</i> | (ZHAO <i>et al.</i> 1998)      |
| W9557     | <i>MATa/α dun1Δ::TRP1/+ sml1Δ::HIS3/+</i>                            | This study                     |
| W9875     | <i>MATa/α dun1Δ::TRP1/+ sml1Δ::HIS3/+ crt1Δ::LEU2/+</i>              | This study                     |
| W9877     | <i>MATa/α dun1Δ::TRP1/+ tel1Δ::URA3/+ mec1-21/+</i>                  | This study                     |
| DK2A      | <i>MATα rnr1::[rnr1-R293A-URA3-pGAL-RNR1]</i>                        | (KUMAR <i>et al.</i> 2010)     |
| DK2D      | <i>MATa rnr1::[rnr1-R293A-URA3-pGAL-RNR1]</i>                        | (KUMAR <i>et al.</i> 2010)     |
| DK8A      | <i>MATa rnr1::[rnr1-Y285A-URA3-pGAL-RNR1]</i>                        | (KUMAR <i>et al.</i> 2010)     |
| DK8E      | <i>MATα rnr1::[rnr1-Y285A-URA3-pGAL-RNR1]</i>                        | (KUMAR <i>et al.</i> 2010)     |
| DK10E     | <i>MATa rnr1::[rnr1-Q288A-URA3-pGAL-RNR1]</i>                        | (KUMAR <i>et al.</i> 2010)     |
| JAK11-5B  | <i>MATα rnr1::[rnr1-Q288E-URA3-pGAL-RNR1]</i>                        | This study                     |
| JAK11-5C  | <i>MATa rnr1::[rnr1-Q288E-URA3-pGAL-RNR1]</i>                        | This study                     |
| W9878     | <i>MATa/α rnr1::[rnr1-Q288E-URA3-pGAL-RNR1]/+ tlc1Δ::HIS3/+</i>      | This study                     |
| W9879     | <i>MATa/α rnr1::[rnr1-Q288A-URA3-pGAL-RNR1]/+ tlc1Δ::HIS3/+</i>      | This study                     |
| W9880     | <i>MATa/α rnr1::[rnr1-R293A-URA3-pGAL-RNR1]/+ tlc1Δ::HIS3/+</i>      | This study                     |
| W9881     | <i>MATa/α rnr1::[rnr1-Y285A-URA3-pGAL RNR1]/+ tlc1Δ::HIS3/+</i>      | This study                     |
| DK3A      | <i>MATa rnr1::[rnr1-Y285F-URA3-pGAL RNR1]</i>                        | (KUMAR <i>et al.</i> 2010)     |
| DK3C      | <i>MATa rnr1::[rnr1-Y285F-URA3-pGAL RNR1]</i>                        | (KUMAR <i>et al.</i> 2010)     |
| W4069-4C  | <i>MATa RNR1 CAN1</i>                                                | (CHABES <i>et al.</i> 2003)    |
| W4069-8C  | <i>MATa rnr1-D57N CAN1</i>                                           | (CHABES <i>et al.</i> 2003)    |
| W9100-12C | <i>MATα ADE2</i>                                                     | This study                     |
| BY4742    | <i>MATα his3Δ1 leu2Δ0 lys2Δ0 ura3Δ0</i>                              | (BRACHMANN <i>et al.</i> 1998) |
| W9882     | <i>MATa/α rnr1Δ::kanMX/+</i>                                         | This study                     |
| MCY602    | <i>MATa rnr1Δ::kanMX LYS2</i>                                        | This study                     |
| MCY603    | <i>MATα rnr1Δ::kanMX</i>                                             | This study                     |
| MCY605    | <i>MATα rnr3Δ::natMX</i>                                             | This study                     |
| MCY606    | <i>MATα yil067cΔ::natMX</i>                                          | This study                     |
| MCY607    | <i>MATα rnr1Δ::kanMX yil067cΔ::natMX</i>                             | This study                     |
