# Supplementary material for: Telomere Length Homeostasis Responds to Changes in Intracellular dNTP Pools
Source: Oxford University Press journal article supplement (doi:10.1534/genetics.112.149120), 2013-01-19
Supplement: genetics.112.149120-5.pdf [file genetics.112.149120-5.pdf]

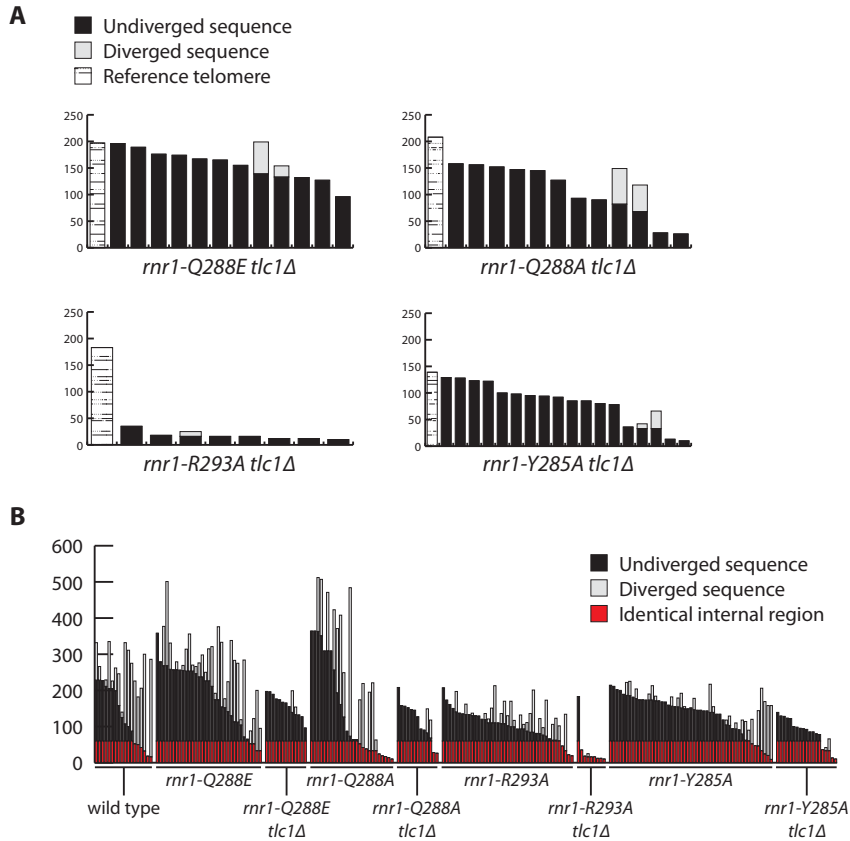

**Figure S6.** The telomere sequence changes in the *rnr1* mutants recorded in Figure 4 are telomerase-dependent. (A) Analysis of sequenced VI-R telomeres after ~30 generations of clonal expansion. Each bar represents an individual VI-R telomere and bars are sorted by the length of the undiverged sequence. The black portion of each bar represents the undiverged region of the telomere. The light gray portion represents the diverged region of the telomere. For each strain, the longest telomere without divergent sequence (hashed bar) is used as a reference telomere to which all other telomeres are compared to determine whether divergence has occurred. (B) All telomeres from all strains analyzed in this study share an identical internal region (as indicated by the red portion of each bars).
