# Supplementary material for: Telomere Length Homeostasis Responds to Changes in Intracellular dNTP Pools
Source: Oxford University Press journal article supplement (doi:10.1534/genetics.112.149120), 2013-01-19
Supplement: genetics.112.149120-6.pdf [file genetics.112.149120-6.pdf]

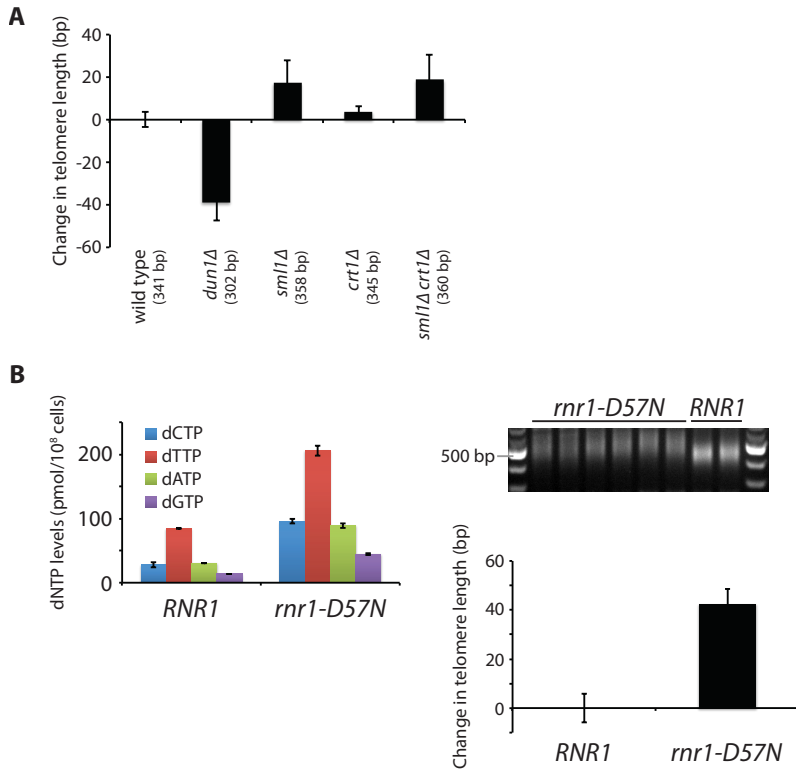

**Figure S2.** (A) The change in telomere length, compared to wild type telomere length, of strains of the indicated genotypes was quantified and plotted. Telomere length was assayed by Y' telomere PCR. Mean  $\pm$  standard error for at least three independent isolates for each genotype are shown. (B) Wild type (*RNR1*) and *rnr1-D57N* strains were assayed for dNTP levels. Data are represented as mean  $\pm$  standard error. Multiple isolates of these strains were assayed for telomere length by Y' telomere PCR (a representative gel is shown) and plotted as in A.
