# Supplementary material for: Telomere Length Homeostasis Responds to Changes in Intracellular dNTP Pools
Source: Oxford University Press journal article supplement (doi:10.1534/genetics.112.149120), 2013-01-19
Supplement: genetics.112.149120-7.pdf [file genetics.112.149120-7.pdf]

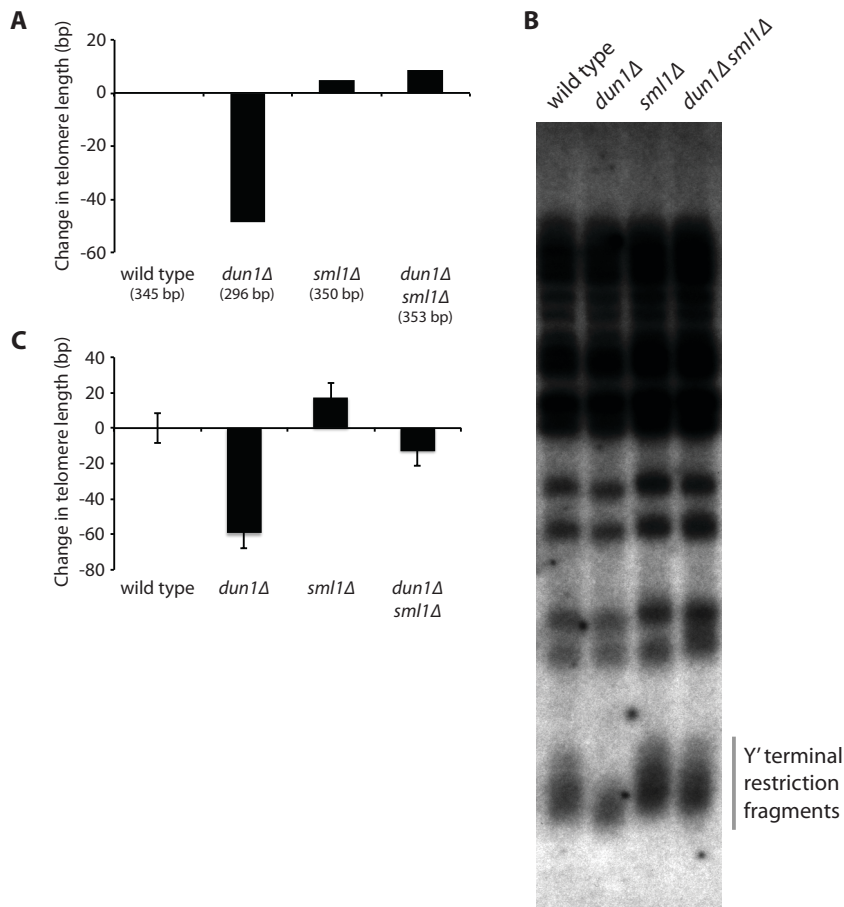

**Figure S1.** Telomeres are shortened in cells lacking Dun1. (A) Strains of the indicated genotypes were assayed for telomere length by telomere I-L PCR after being passaged for at least 100 generations. The change in telomere length, compared to wild type telomere length, was quantified and plotted. (B) Strains in A were assayed for telomere length by denaturing in-gel hybridization (see Supplementary Materials and Methods; a representative gel is shown). The vertical bar indicates the position of the terminal restriction fragments of Y' telomeres, which represent more than half of yeast telomeres. Larger bands represent non-Y'-containing telomeres. (C) The change in telomere length, compared to wild type telomere length, of each strain indicated in B was quantified and plotted. Mean  $\pm$  standard error for four independent isolates for each genotype are shown.
