# Supplementary material for: Telomere Length Homeostasis Responds to Changes in Intracellular dNTP Pools
Source: Oxford University Press journal article supplement (doi:10.1534/genetics.112.149120), 2013-01-19
Supplement: genetics.112.149120-8.pdf [file genetics.112.149120-8.pdf]

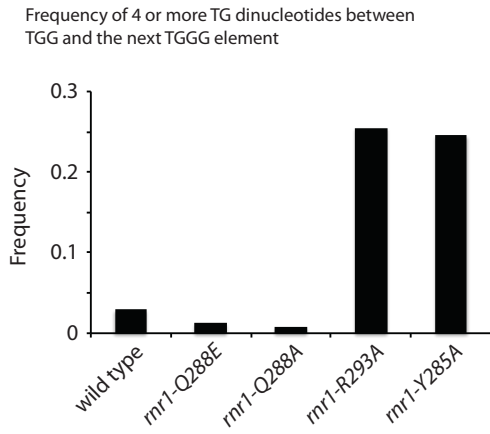

**Figure S5.** The frequency of having 4 or higher TG dinucleotides between a TGG and the following TGGG was plotted for the indicated strains.
