# Supplementary figures and images for: Telomere Length Homeostasis Responds to Changes in Intracellular dNTP Pools
Source: Oxford University Press journal article supplement (doi:10.1534/genetics.112.149120), 2013-01-19

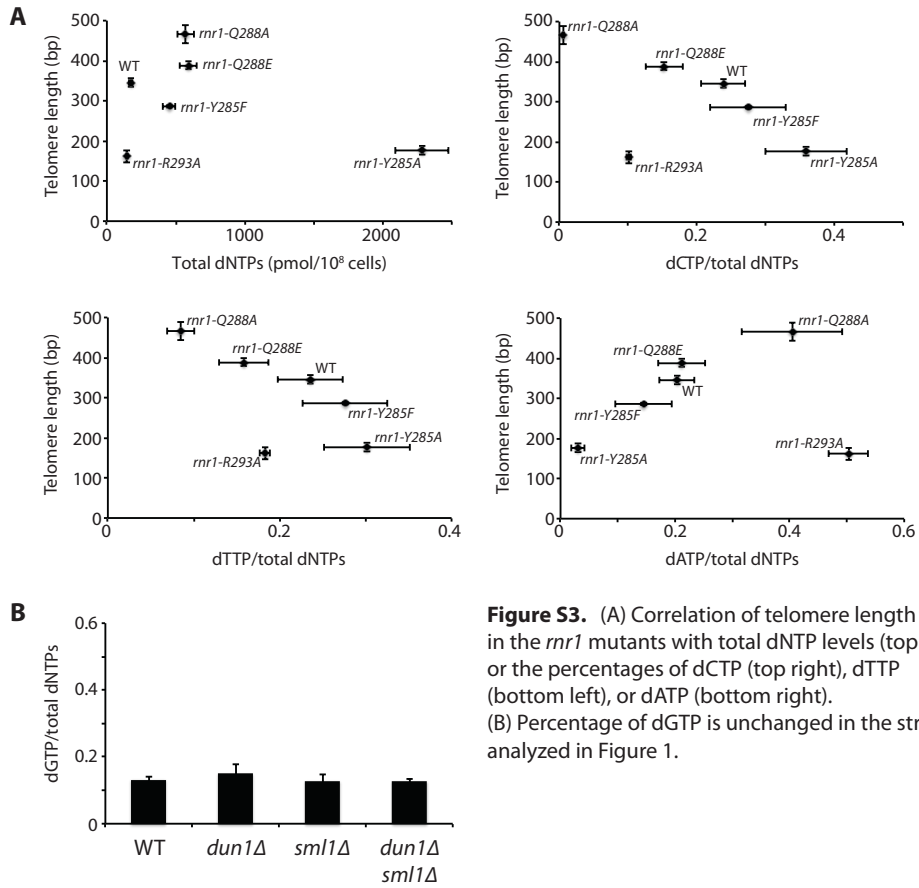

Supplement: genetics.112.149120-2.pdf [file genetics.112.149120-2.pdf]
